# Supplementary material for: Relationship Between the Fatty Acid Profiles and Gut Bacterial Communities of the Chinese Mitten Crab (Eriocheir sinensis) From Ecologically Different Habitats
Source: PubMed Central journal article supplement (PMC7593381; doi:10.3389/fmicb.2020.565267), 2020-10-15
Supplement: Image_2.pdf [file Image_2.pdf]

a

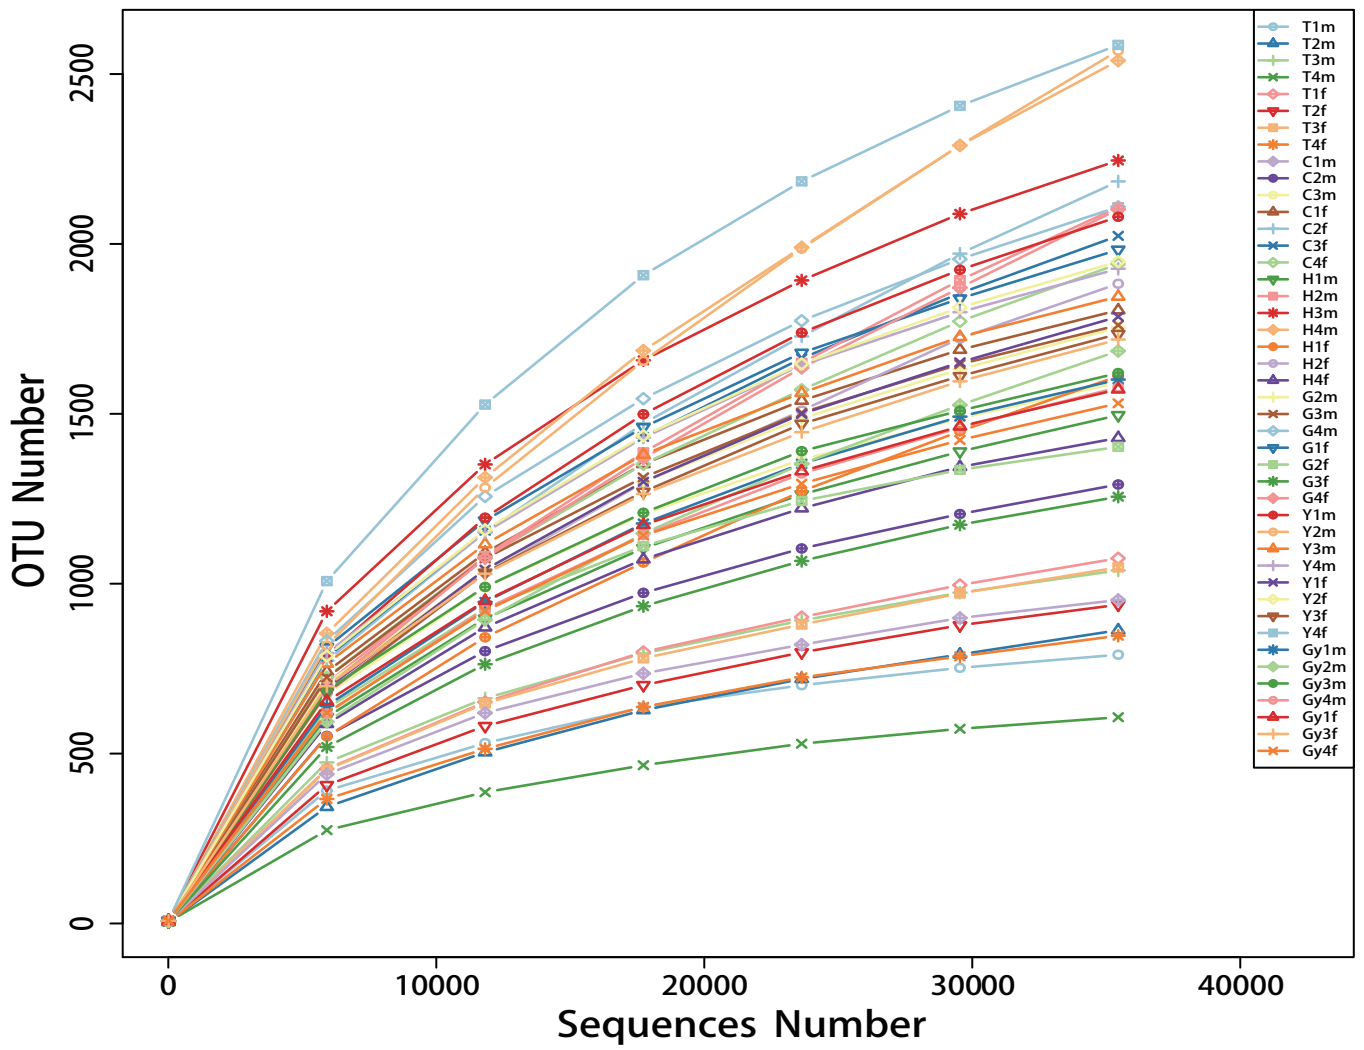

b

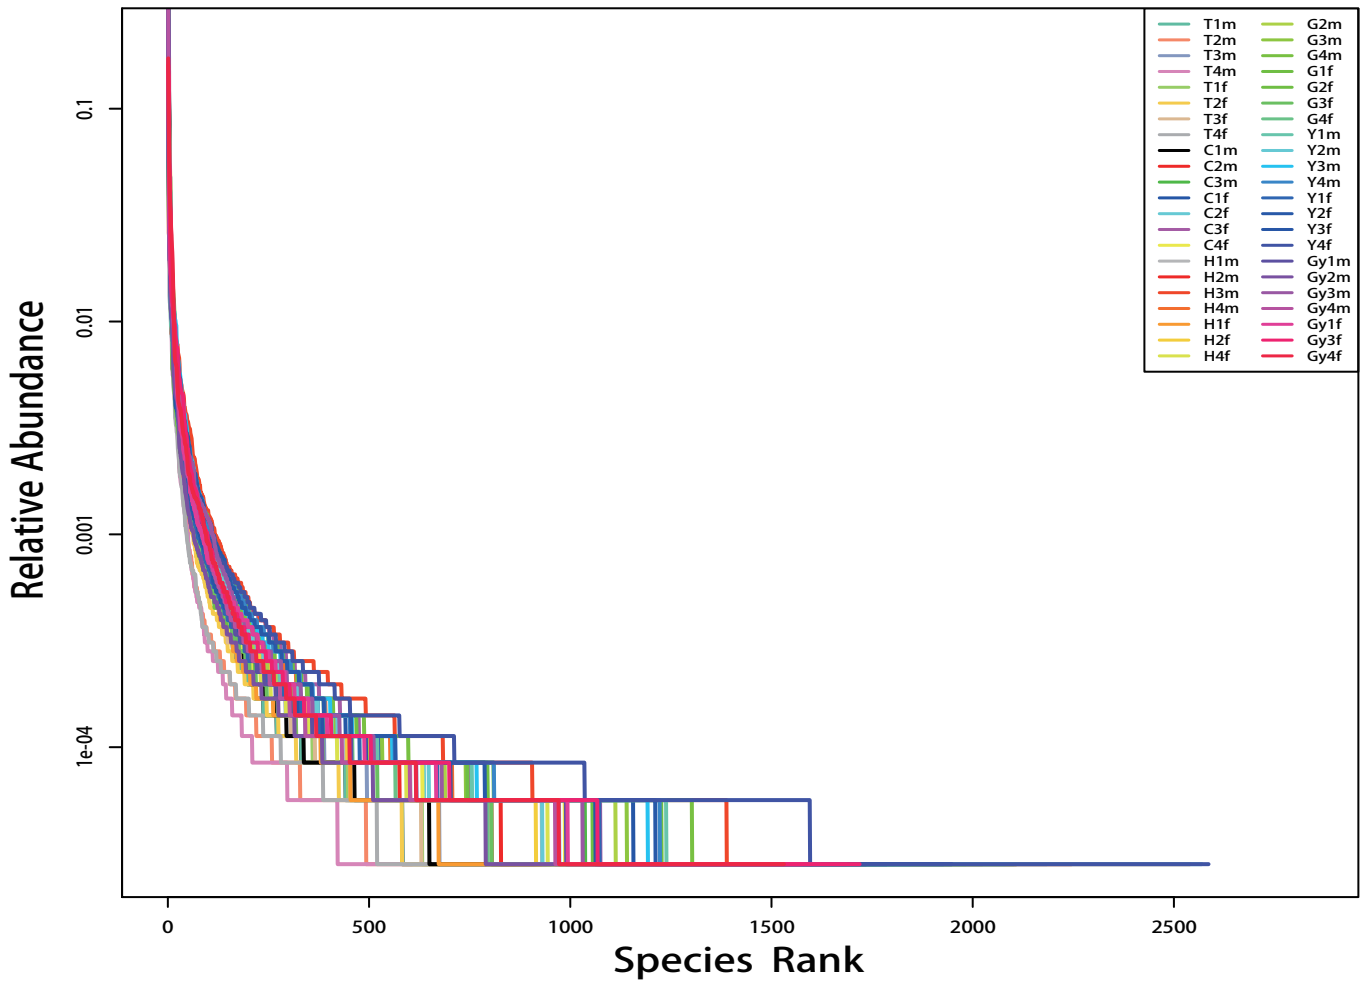

**Supplementary Fig. S2.** Dilution and rank abundance curves for all gut bacteria community. **(A)** Rarefaction curves and **(B)** Ranks abundance curves; the x-axis shows the bacterial species and the y-axis shows the relative abundance of the bacteria. Each curve in the graph represents a different crabs and different colors are used to show their lake of origin or group they belong to. As the sequencing depth increased, the number of gut bacteria increased the relative abundance increased in rarefaction curves and decrease in rank abundance curves.
