# Supplementary material for: Relationship Between the Fatty Acid Profiles and Gut Bacterial Communities of the Chinese Mitten Crab (Eriocheir sinensis) From Ecologically Different Habitats
Source: PubMed Central journal article supplement (PMC7593381; doi:10.3389/fmicb.2020.565267), 2020-10-15
Supplement: Image_3.pdf [file Image_3.pdf]

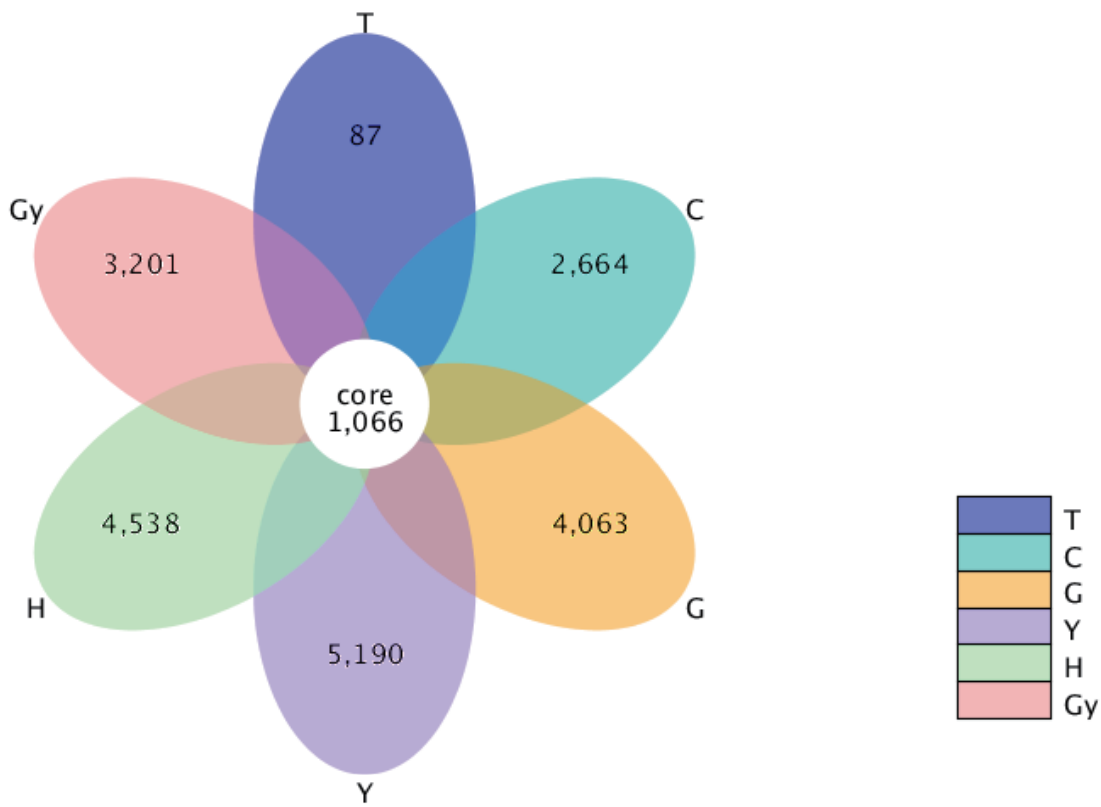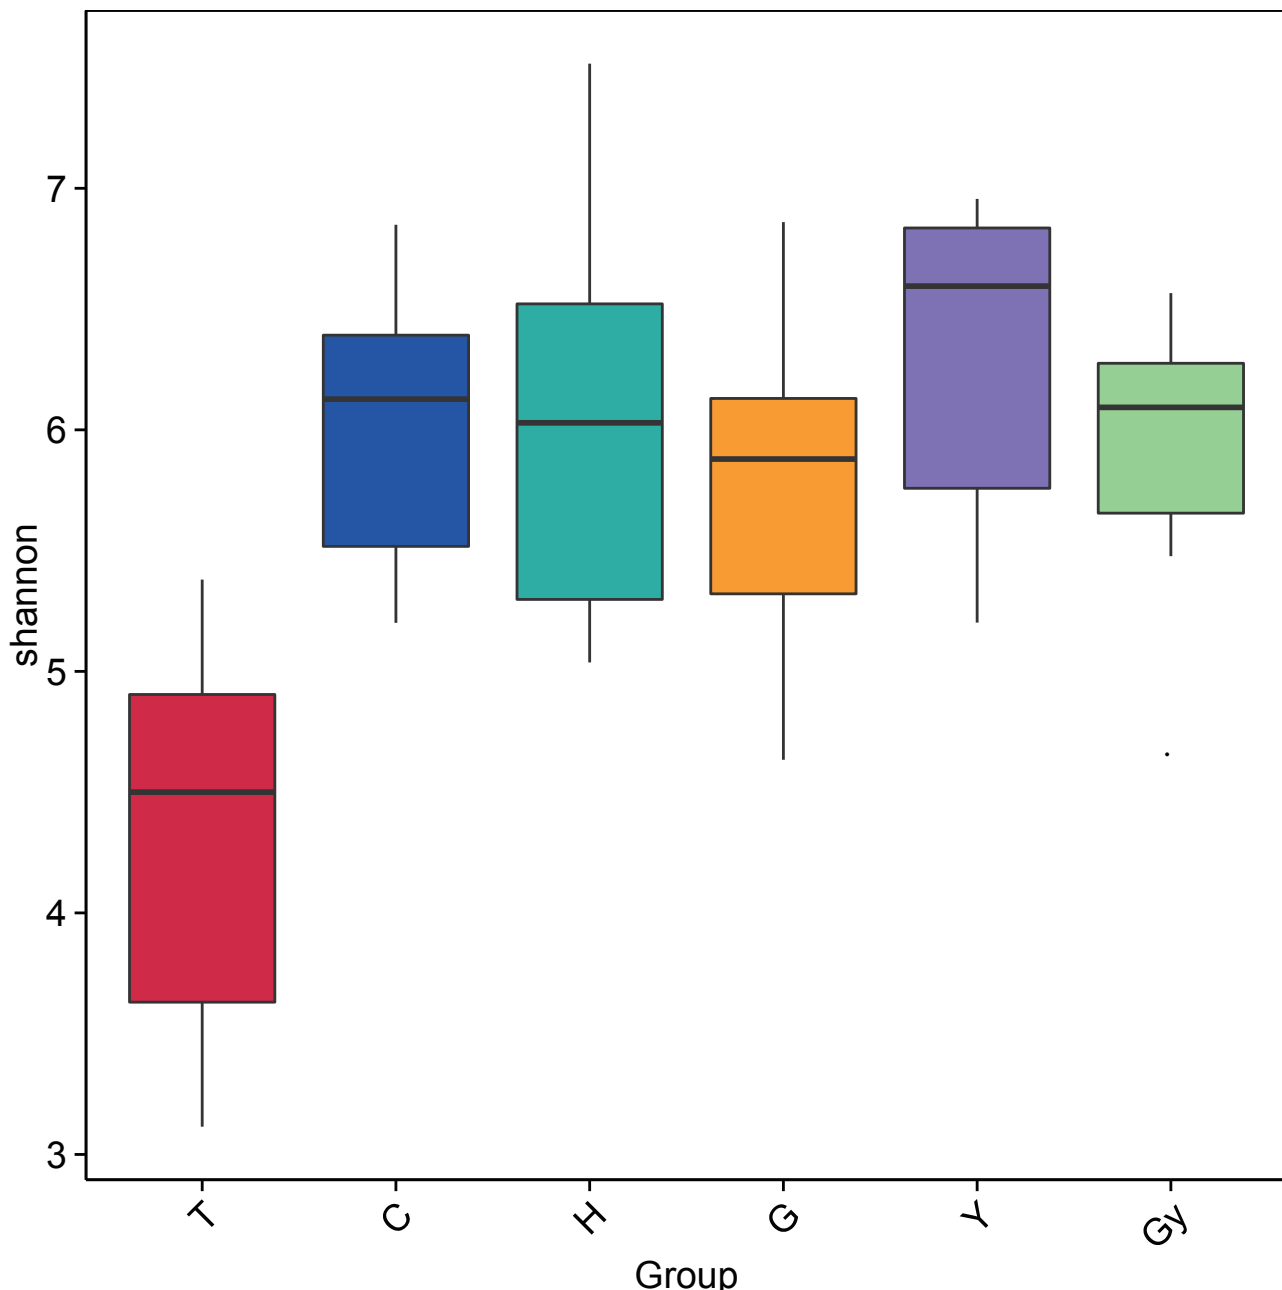

**Supplementary Fig.S3** Core bacterial number among all groups and Shannon index box of six crab populations. **(A)** Venn diagram showing gut bacteria in each crab population. **(B)** Box plot of Shannon index showing the differences in the gut bacterial community of the six crab populations.
