# Supplementary material for: Relationship Between the Fatty Acid Profiles and Gut Bacterial Communities of the Chinese Mitten Crab (Eriocheir sinensis) From Ecologically Different Habitats
Source: PubMed Central journal article supplement (PMC7593381; doi:10.3389/fmicb.2020.565267), 2020-10-15
Supplement: Image_5.pdf [file Image_5.pdf]

Abundance

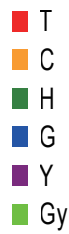

a

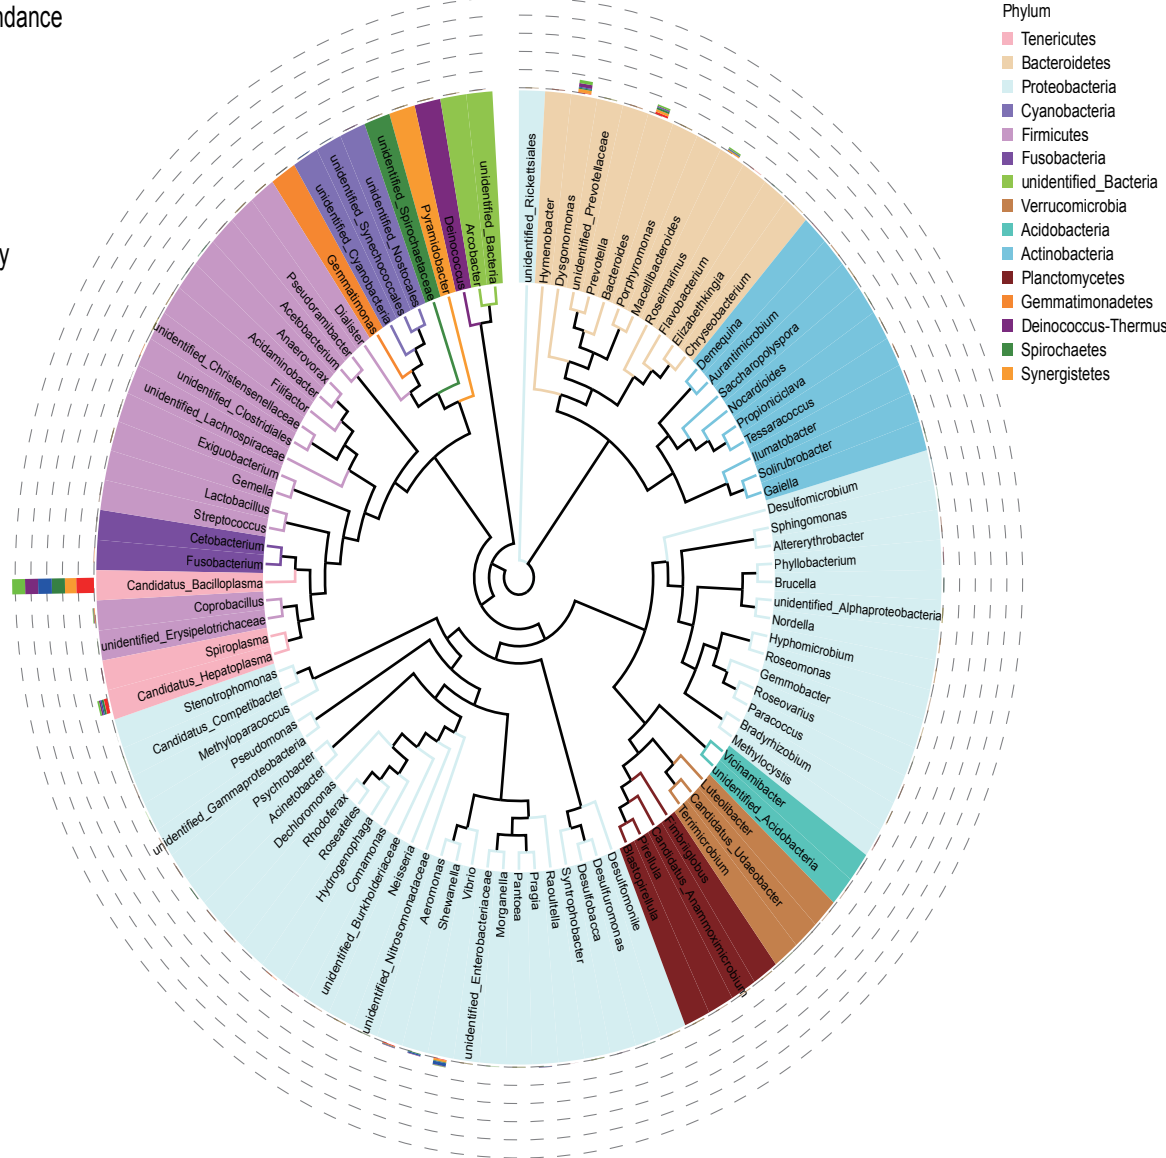

b

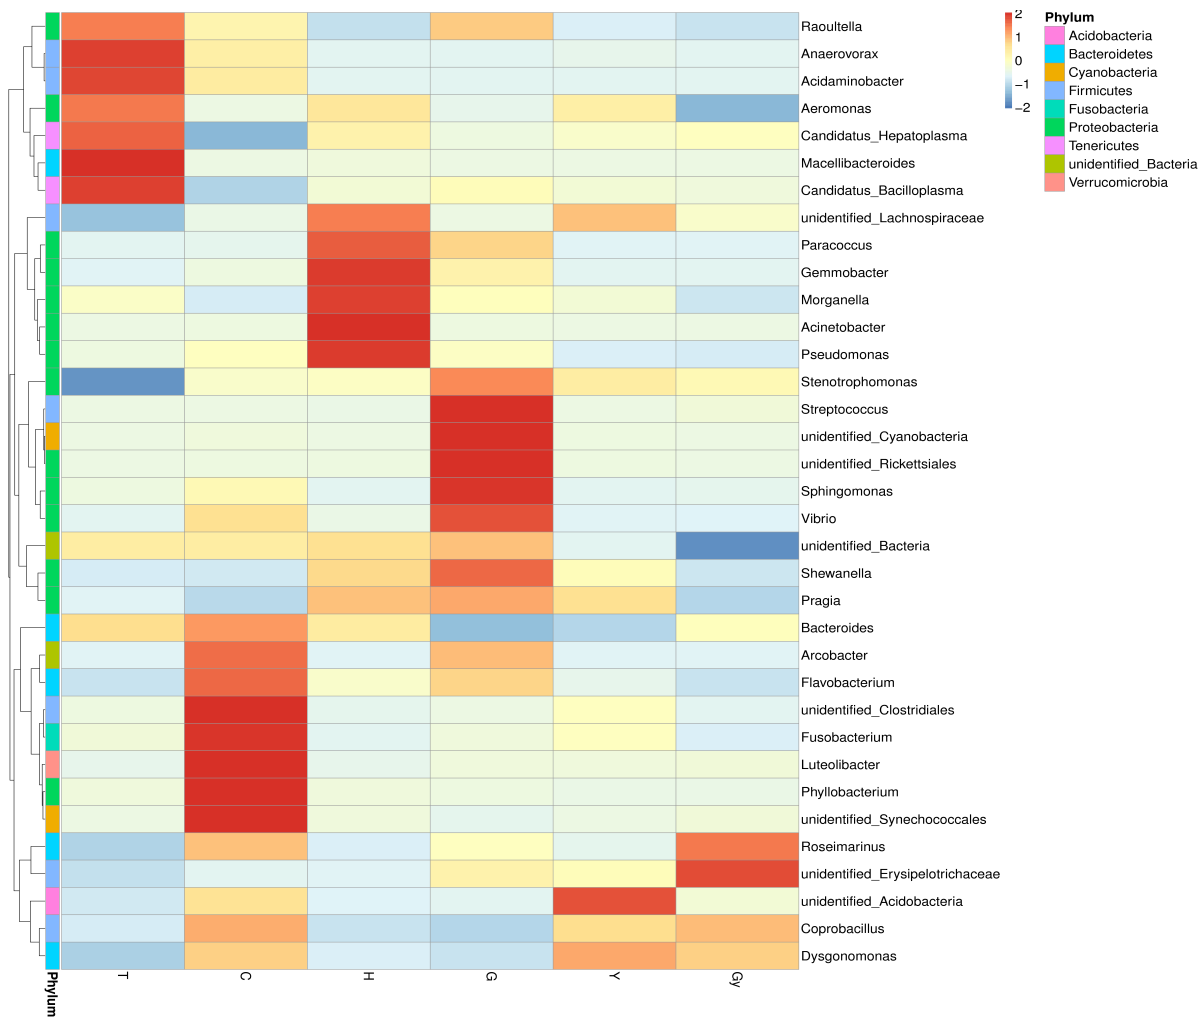

**Supplementary Fig. S5** Cladogram of LEfSe and Heat map of the correlation between gut bacteria and crab's geographical origin. **(A)** Cladogram of LEfSe analysis showing abundance of microbial taxa in the six crab populations. The inner circle is the phylogenetic tree constructed by the representative sequences of genera. The color of branches represents their corresponding phylum, each color represents a phylum, and the outer circle represents the relative abundance of each genus in each group. **(B)** Heat map of the correlation matrix between crab population and the bacteria communities at phylum level. The horizontal axis are the different bacteria phyla represented by different color and on the horizontal axis are the lakes of crab origin. Red orange tones indicate a positive correlation between crab population and the bacteria communities; blue and yellow white indicate absence of correlation as for example.
