# Supplementary material for: Relationship Between the Fatty Acid Profiles and Gut Bacterial Communities of the Chinese Mitten Crab (Eriocheir sinensis) From Ecologically Different Habitats
Source: Front Microbiol. 2020 Oct 15;11:565267. doi: 10.3389/fmicb.2020.565267 (PMC7593381; doi:10.3389/fmicb.2020.565267)
Supplement: Supplementary Table 2 — Alpha and beta diversity parameters. [file Table_2.xls]

## Sheet: alpha_diversity_index
Sample name	observed_species	shannon	simpson	chao1	ACE	goods_coverage	PD_whole_tree
T1m	791	5.121	0.907	944.07	959.788	0.994	97.915
T2m	863	3.23	0.568	1278.97	1400.3	0.99	101.376
T3m	1039	5.38	0.905	1406.02	1460.52	0.99	119.274
T4m	607	3.764	0.813	743.548	794.366	0.995	92.41
T1f	1075	4.659	0.814	1606.6	1670.22	0.987	118.58
T2f	938	4.341	0.788	1340.19	1367.68	0.99	110.637
T3f	1048	4.832	0.818	1539.97	1593.54	0.988	110.186
T4f	847	3.115	0.549	1244.24	1221.32	0.991	107.57
C1m	952	5.201	0.912	1196.67	1252.19	0.991	117.161
C2m	1292	5.205	0.876	1874.49	1855.22	0.986	148.502
C3m	1592	5.83	0.89	2125.88	2159.39	0.984	171.282
C1f	1805	6.455	0.953	2325.49	2479.61	0.982	163.015
C2f	2184	6.127	0.921	4361.64	4748.84	0.966	192.657
C3f	2024	6.849	0.958	3406.74	3523.08	0.973	189.632
C4f	1941	6.329	0.947	3224.2	3542.03	0.973	174.189
H1m	1496	5.411	0.9	1985.21	2161.37	0.984	147.114
H2m	2108	6.029	0.908	5348.47	5412.79	0.964	190.496
H3m	2246	7.516	0.976	3005.61	3264.26	0.976	189.741
H4m	2540	6.883	0.961	5661.88	5972.01	0.958	210.149
H1f	1611	5.037	0.839	3612.78	3723.07	0.974	152.123
H2f	1883	6.16	0.945	3348.61	3672.32	0.973	167.942
H4f	1429	5.185	0.828	1763.82	1909.9	0.986	147.151
G2m	1754	6.028	0.911	2238.14	2440.87	0.982	171.725
G3m	1761	6.232	0.916	2241.07	2371.25	0.982	160.147
G4m	2109	5.879	0.843	2767.34	3025.07	0.977	197.401
G1f	1983	6.86	0.96	2643.84	2836.34	0.979	163.642
G2f	1403	4.8	0.773	1596.52	1659.97	0.99	161.782
G3f	1256	4.634	0.759	1613.63	1750.9	0.987	133.048
G4f	2102	5.842	0.866	5818.43	5843.18	0.963	178.276
Y1m	2080	5.937	0.911	2811.53	3075.82	0.976	198.69
Y2m	2569	6.496	0.936	7312.25	7129.21	0.954	223.785
Y3m	1845	6.827	0.96	2344.71	2566.44	0.982	167.639
Y4m	1927	6.694	0.951	2527.87	2697.91	0.98	175.289
Y1f	1786	5.221	0.817	2416.05	2613.71	0.98	177.64
Y2f	1948	6.862	0.956	2586.16	2764.58	0.979	174.785
Y3f	1735	5.202	0.8	2361.39	2469.13	0.981	174.621
Y4f	2586	6.956	0.922	3460.41	3659.08	0.972	227.059
Gy1m	1601	5.833	0.913	2102.25	2281.28	0.983	148.941
Gy2m	1685	4.657	0.775	3111.9	3312.39	0.975	175.49
Gy3m	1620	6.566	0.954	2115.03	2286.38	0.983	152.766
Gy4m	1578	5.477	0.849	2101.26	2308.5	0.983	161.848
Gy1f	1572	6.093	0.94	2082.16	2221.47	0.984	143.668
Gy3f	1719	6.37	0.944	2294.14	2454.69	0.982	154.937
Gy4f	1531	6.181	0.946	1970.66	2156.41	0.984	148.175
